# Supplementary material for: High-Level Rovibrational Calculations on Ketenimine
Source: Frontiers journal article supplement (doi:10.3389/fchem.2020.623641), 2021-01-06
Supplement: Data_Sheet_1.PDF [file Data_Sheet_1.PDF]

Supporting information on:  
**High-level rovibrational calculations on  
ketenimine**

Martin Tschöpe, Benjamin Schröder, Sebastian Erfort,  
Guntram Rauhut\*

*Institute for Theoretical Chemistry, University of Stuttgart, Pfaffenwaldring  
55, 70569 Stuttgart, Germany.*

E-mail: rauhut@theochem.uni-stuttgart.de

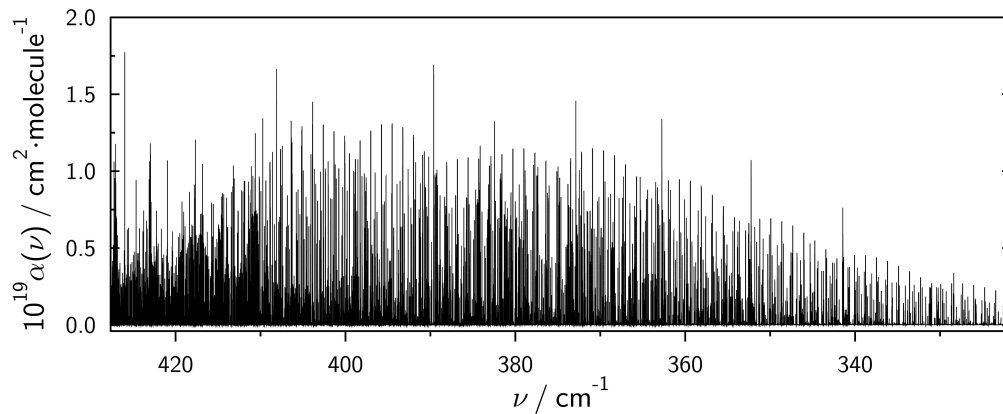

Figure S1: Calculated rovibrational spectrum of the  $\nu_{12}$  band in ketenimine ( $\text{H}_2\text{C}=\text{C}=\text{NH}$ ) at 300 K. The spectrum is obtained by convolving the calculated line intensities with a gaussian profile (FWHM = 0.002 cm).

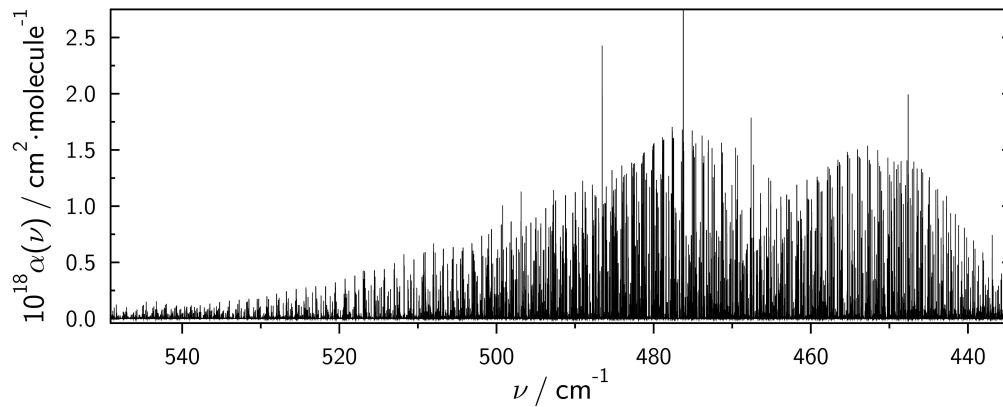

Figure S2: Calculated rovibrational spectrum of the  $\nu_8$  band in ketenimine ( $\text{H}_2\text{C}=\text{C}=\text{NH}$ ) at 300 K. The spectrum is obtained by convolving the calculated line intensities with a gaussian profile (FWHM = 0.002 cm<sup>-1</sup>).

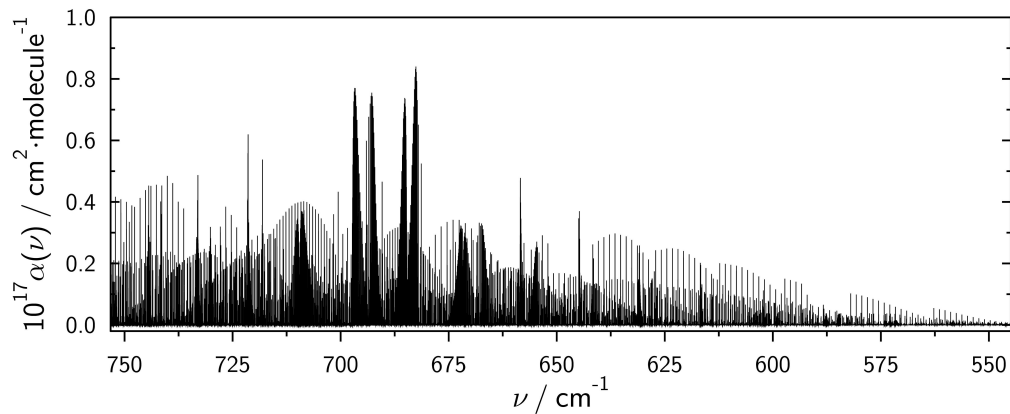

Figure S3: Calculated rovibrational spectrum of the  $\nu_7$  band in ketenimine ( $\text{H}_2\text{C}=\text{C}=\text{NH}$ ) at 300 K. The spectrum is obtained by convolving the calculated line intensities with a gaussian profile ( $\text{FWHM} = 0.002 \text{ cm}^{-1}$ ).

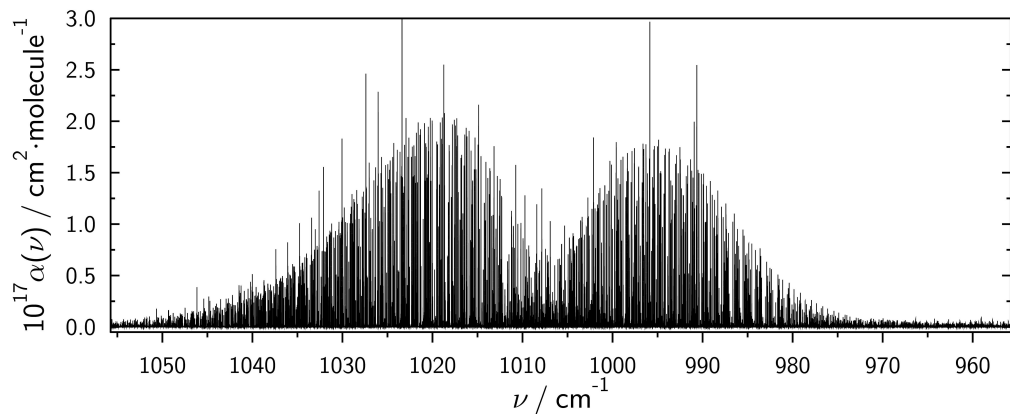

Figure S4: Calculated rovibrational spectrum of the  $\nu_6$  band in ketenimine ( $\text{H}_2\text{C}=\text{C}=\text{NH}$ ) at 300 K. The spectrum is obtained by convolving the calculated line intensities with a gaussian profile ( $\text{FWHM} = 0.002 \text{ cm}^{-1}$ ).
